# Supplementary material
Source: Royal Society of Chemistry journal article supplement (doi:10.1039/d6ta01057a)
Supplement: d6ta01057a1.pdf [file d6ta01057a1.pdf]

## Supporting Information

# Defective Ceria as a Structural and Electronic Modifier of Nitrogen-Doped Carbon and Cobalt-Nitrogen-Carbon Electrocatalysts for Oxygen Reduction in Alkaline Electrolyte

Wajdi Alnoush, Navid Noor, Shayan Angizi, Amirhossein Raksha, Thomas Baker, and Drew Higgins\*

Wajdi Alnoush, Chemical Engineering Department, McMaster University  
1280 Main St W, Hamilton, ON L8S 4L8, Canada.  
[alnoushw@mcmaster.ca](mailto:alnoushw@mcmaster.ca)

Navid Noor, Chemical Engineering Department, McMaster University  
1280 Main St W, Hamilton, ON L8S 4L8, Canada.  
[noormohn@mcmaster.ca](mailto:noormohn@mcmaster.ca)

Shayan Angizi, Chemical Engineering Department, McMaster University  
1280 Main St W, Hamilton, ON, L8S 4L8, Canada.  
[angizis@mcmaster.ca](mailto:angizis@mcmaster.ca)

Amirhossein Raksha, Chemical Engineering Department, McMaster University  
1280 Main St W, Hamilton, ON, L8S 4L8, Canada.  
[rakhsha@mcmaster.ca](mailto:rakhsha@mcmaster.ca)

Thomas Baker, Chemical Engineering Department, McMaster University  
1280 Main St W, Hamilton, ON, L8S 4L8, Canada.  
[bakert4@mcmaster.ca](mailto:bakert4@mcmaster.ca)

\*Drew Higgins, Chemical Engineering Department, McMaster University  
1280 Main St W, Hamilton, ON, L8S 4L8, Canada.  
[higgid2@mcmaster.ca](mailto:higgid2@mcmaster.ca)

### **Note S1 – Crystallite size and interplanar spacing estimation from XRD patterns using Scherrer’s equation and Bragg’s law**

To determine the average crystallite size (D), the Scherrer equation was used:

$$D = \frac{K \cdot \lambda}{(FWHM \cdot \cos\theta)} \quad \text{Equation. S1}$$

where  $K$  is the Scherrer constant (0.64),  $\lambda$  is the wavelength of the X-ray radiation (1.541 Å, Cu  $K\alpha_1$ ), FWHM is the peak’s full width at half maximum, and  $\theta$  is the Bragg angle (in radians). The reported Scherrer crystallite sizes reported herein are based on the observed FWHM values without instrumental broadening correction. Accordingly, the analysis is employed to compare relative changes in apparent crystallite size across the sample series, rather than to provide absolute size values.

Furthermore, to estimate the interplanar spacing (d-spacing), Bragg’s law was used:

$$d - \text{spacing} = \frac{n \cdot \lambda}{2 \cdot \sin\theta} \quad \text{Equation. S2}$$

where  $n$  is the order of reflection (1),  $\lambda$  is the wavelength of the X-ray radiation (1.541 Å, Cu  $K\alpha_1$ ), and  $\theta$  is the Bragg angle (in degrees)

### **Note S2 – g-factor determination from EPR spectra**

The position of the EPR resonance is characterized by the g-factor, which is sensitive to ligand field and symmetry around the paramagnetic  $Ce^{3+}$ . The g-factor was determined using the Gaussian fits of the baseline-corrected EPR spectra according to the following equation:

$$g - \text{factor} = \frac{h \cdot \nu}{\mu_B \cdot B_0} \quad \text{Equation. S3}$$

where  $h$  is Planck’s constant ( $6.625 \times 10^{-34}$  m<sup>2</sup> · kg/s),  $\nu$  is the microwave frequency (9.45 GHz),  $\mu_B$  is Bohr magneton ( $9.274 \times 10^{-24}$  A · m<sup>2</sup>), and  $B_0$  is the applied resonant magnetic field.

### **Note S3 – Electrochemically active surface area (ECSA) determination**

The double-layer capacitance ( $C_{dl}$ ) method was used for estimating the electrochemically active surface area (ECSA). In Ar-saturated 0.1 M KOH, cyclic voltammograms (CVs) were collected at different scan rates (5-100 mV/s) in the non-Faradic region (0.9-1.0 V vs. RHE). For each CV, the difference between the anodic and cathodic current densities at the mid-potential was calculated and plotted as a function of the scan rate, and the  $C_{dl}$  was estimated from the slope. We used the specific capacitance ( $C_s$ ) value of 0.02 mF/cm<sup>2</sup> in our calculations.<sup>1,2</sup> Using the mass loading of the catalyst ( $m_{cat}$ ), ECSA was then determined as follows:

$$ECSA = \frac{C_{dl}}{C_s \times m_{cat}} \quad \text{Equation. S4}$$

It is worth noting that the utilized  $C_s$  value is typical for carbonaceous materials, which is the dominant phase of the studied ceria@N-C and ceria@Co/N-C catalysts. While the absolute ECSA values depend on the assumed  $C_s$ , the use of a constant  $C_s$  across all samples enables reliable relative comparisons of electrochemically accessible surface area within this study.

### **Note S4 – Equivalent circuit modeling of electrochemical impedance spectroscopy (EIS)**

#### Fitting procedure

EIS spectra were fitted with an equivalent circuit model accounting for solution resistance ( $R_s$ ), interfacial charge-transfer resistance ( $R_{ct}$ ), non-ideal capacitive behavior via a constant phase element (CPE), and mixed semi-infinite ( $W$ ) and finite ( $W_o$ ) Warburg diffusion elements. To ensure the reliability of the EIS analysis, multiple equivalent circuit models were systematically evaluated, including Randles-type circuits and models with finite and infinite Warburg elements. Final circuit selection was based on optimal fit quality (minimized root-mean-square error) and physical interpretability.

#### Summary of results

At the low-frequency tail, the prepared electrocatalysts displayed distinct diffusion behaviors. Among ceria@N-C samples, V<sub>o</sub>-rich prCeO<sub>2</sub>@N-C and trCeO<sub>2</sub>@N-C exhibited less steep Warburg tails and reduced finite Warburg resistance ( $W_o$ ) of 0.05 and 0.045 Ω, respectively, compared to 0.072 Ω for CeO<sub>2</sub>@N-C, indicating enhanced ionic transport through defect-mediated pathways. Interestingly, this vacancy-driven diffusion improvement was only observed in ceria@N-C samples, whereas metallic Co NPs in ceria@Co/N-C samples alter ion-transport pathways and obscure vacancy-enabled diffusion gains, evident from their significantly higher  $W_o$  values. The semi-infinite Warburg coefficient ( $W$ ) also showed support-dependent trends. Ceria@N-C samples exhibited lower  $W$  values ( $\approx 52$ - $74 \Omega \cdot s^{-1/2}$ ) than pristine N-C ( $105.9 \Omega \cdot s^{-1/2}$ ), consistent with reduced diffusion impedance and more accessible ion-transport pathways upon ceria incorporation. In contrast, ceria@Co/N-C series displayed larger  $W$  values ( $55$ - $137 \Omega \cdot s^{-1/2}$ ), indicating metallic Co NPs and the associated microstructural changes introduce additional transport resistance that overshadows vacancy-driven diffusion improvements. The CPE parameters reflect subtle interface differences, where ceria@N-C and ceria@Co/N-C electrocatalysts generally exhibiting higher CPE constants ( $\sim 10^{-7} \Omega^{-1} \cdot s^\alpha$ ) and slightly smaller exponents ( $\alpha=0.84$ - $0.89$ ) compared to ceria-free N-C ( $6.12 \times 10^{-8} \Omega^{-1} \cdot s^\alpha$ ,  $\alpha=0.92$ ) and Co/N-C ( $6.93 \times 10^{-8} \Omega^{-1} \cdot s^\alpha$ ,  $\alpha=0.91$ ), reflecting a more heterogeneous interfacial structure upon ceria integration.

Additionally, Bode magnitude and phase angle plots (Figs. S11a and S11b) for individual catalyst components (i.e., CeO<sub>2</sub>, N-C, and Co/N-C) and ceria@N-C catalysts (i.e., CeO<sub>2</sub>@N-C, prCeO<sub>2</sub>@N-C, and trCeO<sub>2</sub>@N-C) corroborate observations from Nyquist plots. At low frequencies, CeO<sub>2</sub> exhibited the highest impedance (> 3 Ω) and lowest phase angle (< 20°), indicative of its poor charge transfer. In contrast, N-C and Co/N-C started from a lower impedance of ~2.9 Ω at 0.1 Hz that progressively decreased to ~1.8 Ω at 10 Hz, while phase angles started high (> 70°) at 0.1 Hz and progressively dropped to < 20° at 10 Hz. At intermediate frequencies, CeO<sub>2</sub> exhibited a broad peak, consistent with sluggish electron/ion migration, while the phase response for N-C and Co/N-C was flattened, suggesting better charge transfer kinetics and improved capacitive-to-resistive transition. For ceria@N-C electrocatalysts, CeO<sub>2</sub>@N-C exhibited the highest impedance among at the low frequency region, followed by V<sub>o</sub>-rich trCeO<sub>2</sub>@N-C and prCeO<sub>2</sub>@N-C. A similar trend was observed for phase angles, with the trend following CeO<sub>2</sub>@N-C > trCeO<sub>2</sub>@N-C > prCeO<sub>2</sub>@N-C, indicating enhanced charge transfer in samples embedding defective ceria.

#### **Note S5 – Collection efficiency (N) in the RRDE tip**

The collection efficiency ( $N$ ) of the ring was calibrated using potassium ferricyanide. First, 1 M KCl with 10 mM K<sub>3</sub>[Fe(CN)<sub>6</sub>] electrolyte was prepared and Ar-saturated. Then, voltammograms were collected in a 3-electrode cell with a Ag/AgCl (saturated KCl) reference electrode and a graphite rod counter electrode. The potential at the disk was scanned from 1-0.4 V vs. RHE, whereas the potential of the ring was fixed. Thus, Fe<sup>3+</sup> → Fe<sup>2+</sup> reduction occurred at the disk while Fe<sup>2+</sup> → Fe<sup>3+</sup> oxidation occurred at the ring. The collection efficiency ( $N$ ) was then determined as follows:

$$N = -\frac{I_{Ring}}{I_{Disk}} \quad \text{Equation. S5}$$

#### **Note S6 – ECSA-normalized activity**

The ECSA-normalized activity ( $j_{ECSA}$ ) of the catalysts was calculated at 0.75 V vs. RHE according to the following equation:

$$j_{ECSA} = \frac{j_k}{ECSA} \quad \text{Equation. S6}$$

where  $j_k$  is the kinetic current density determined from the Koutecký-Levich equation<sup>3</sup>:

$$\frac{1}{j_k} = \frac{1}{j} - \frac{1}{j_d} \quad \text{Equation. S7}$$

Where  $j$  is the current density and  $j_d$  is the diffusion-limited current density.

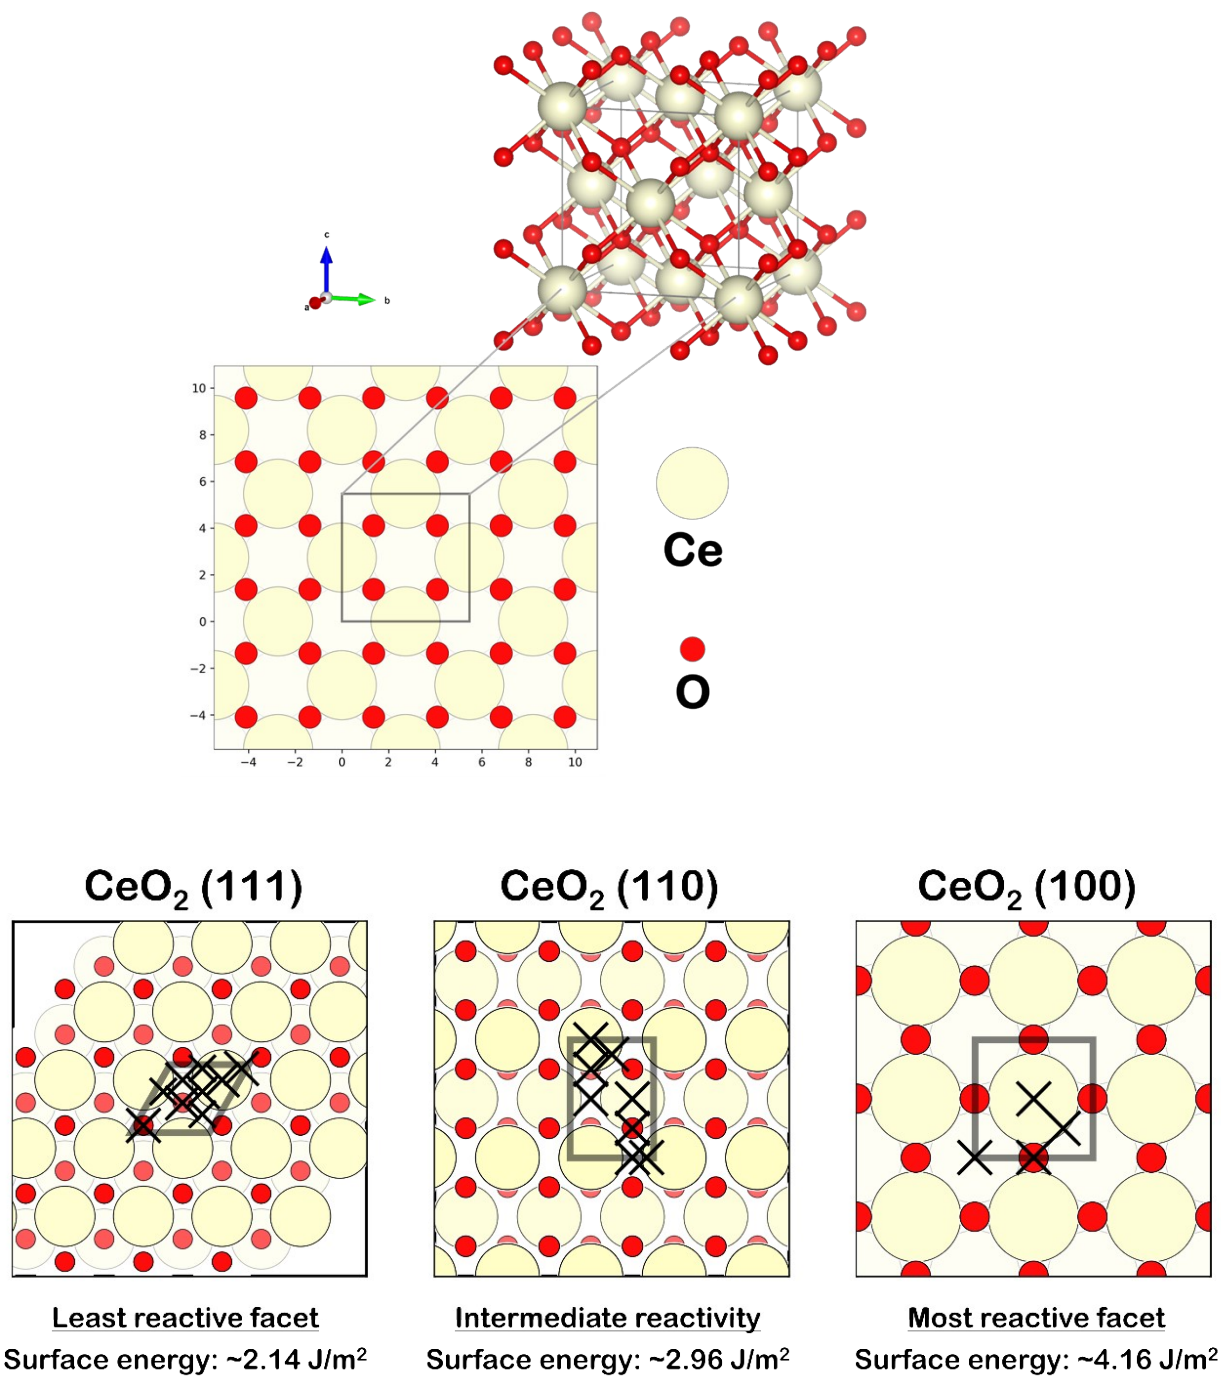

**Figure S1.** Crystal structure of fluorite CeO<sub>2</sub>. Bottom panel: structures and surface energies of the (111), (100), and (110) facets of CeO<sub>2</sub>. The (100) facet is equivalent to (200), while the (11) facet is equivalent to (220). Crosses (×) denote potential adsorption sites.

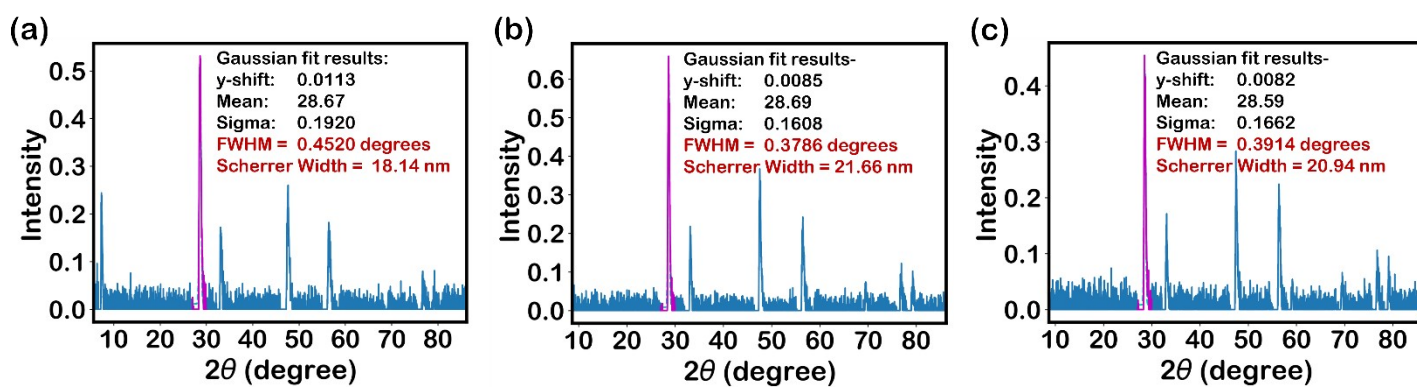

**Figure S2.** Crystallite size (Scherrer width) determination from XRD diffraction patterns of  $\text{CeO}_2$ ,  $\text{prCeO}_2$ , and  $\text{trCeO}_2$ . Diffraction patterns and fitted (111) peak of (a)  $\text{CeO}_2$ , (b)  $\text{prCeO}_2$ , and (c)  $\text{trCeO}_2$ .

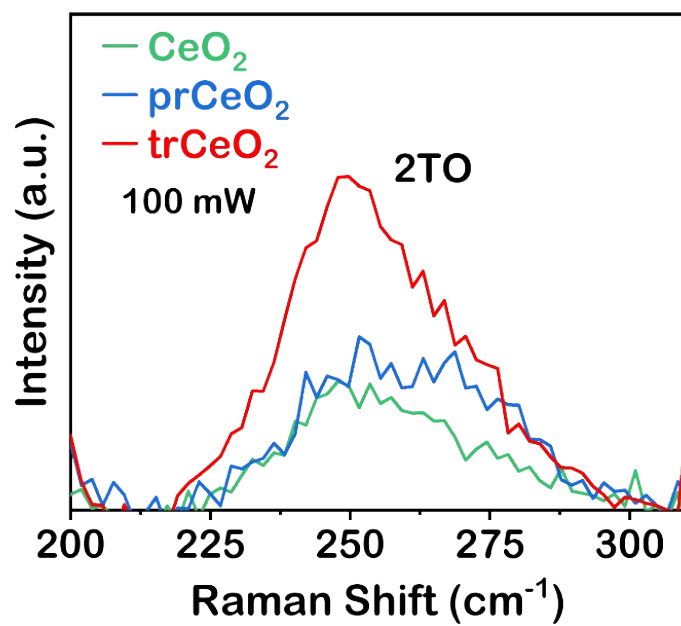

**Figure S3.** Raman spectra of the 2TO band region of CeO<sub>2</sub>, prCeO<sub>2</sub>, and trCeO<sub>2</sub>.

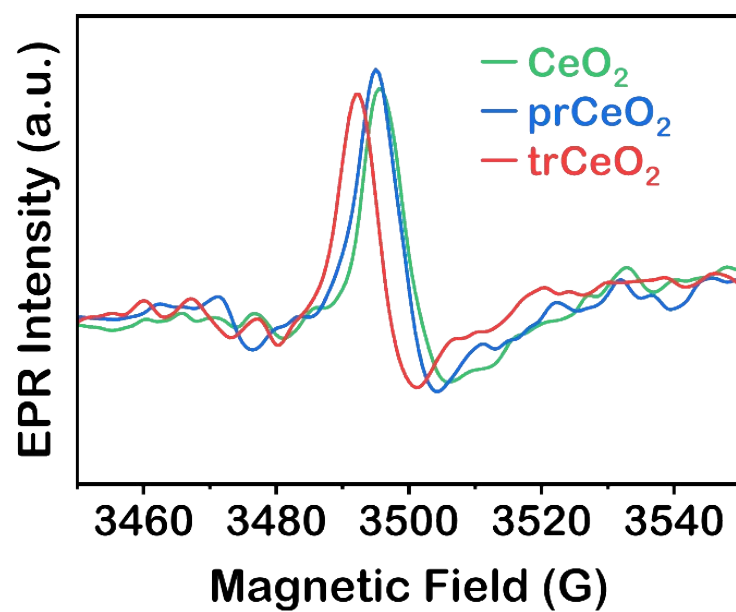

**Figure S4.** Baseline-corrected EPR spectra of  $\text{CeO}_2$ ,  $\text{prCeO}_2$ , and  $\text{trCeO}_2$  precursors.

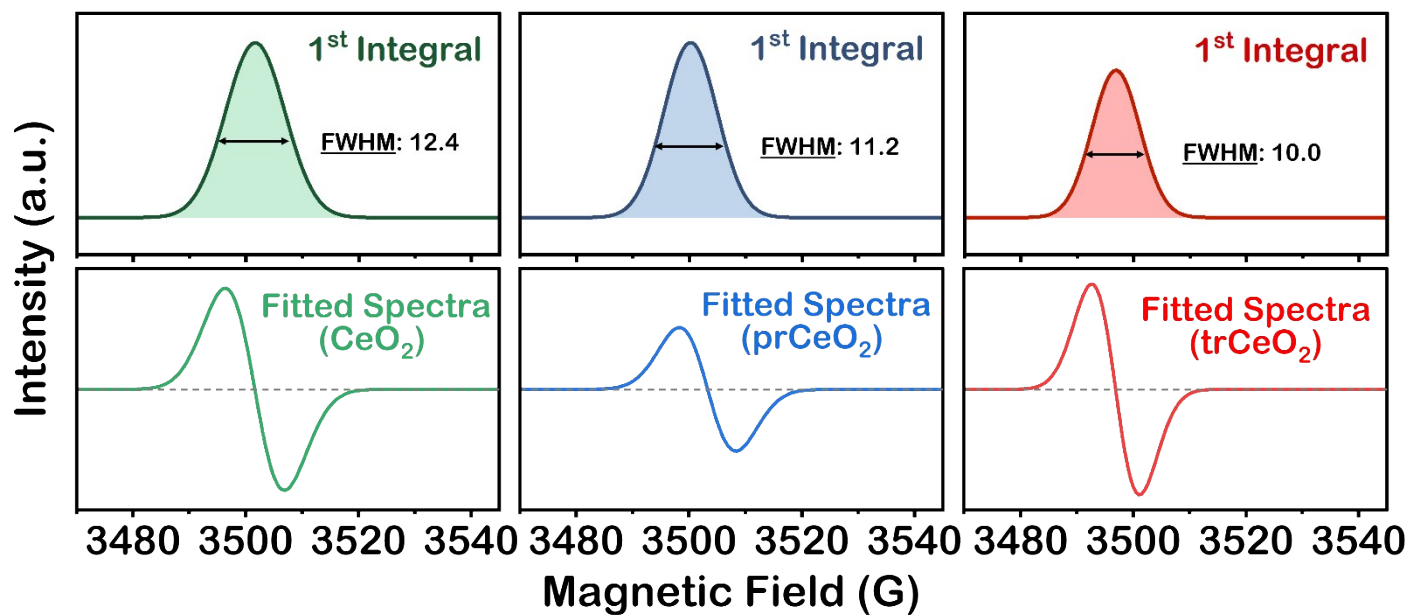

**Figure S5.** Gaussian fitting (bottom panel) and the corresponding integration (top panel) of the EPR spectra of  $\text{CeO}_2$ ,  $\text{prCeO}_2$ , and  $\text{trCeO}_2$  precursors.

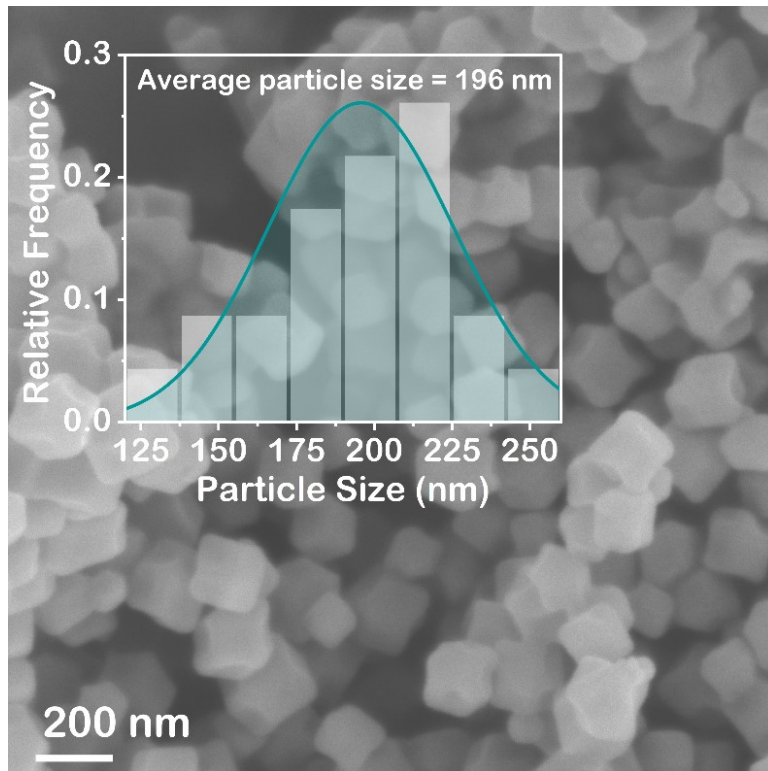

**Figure S6.** SEM of Zn-ZIF8 particles.

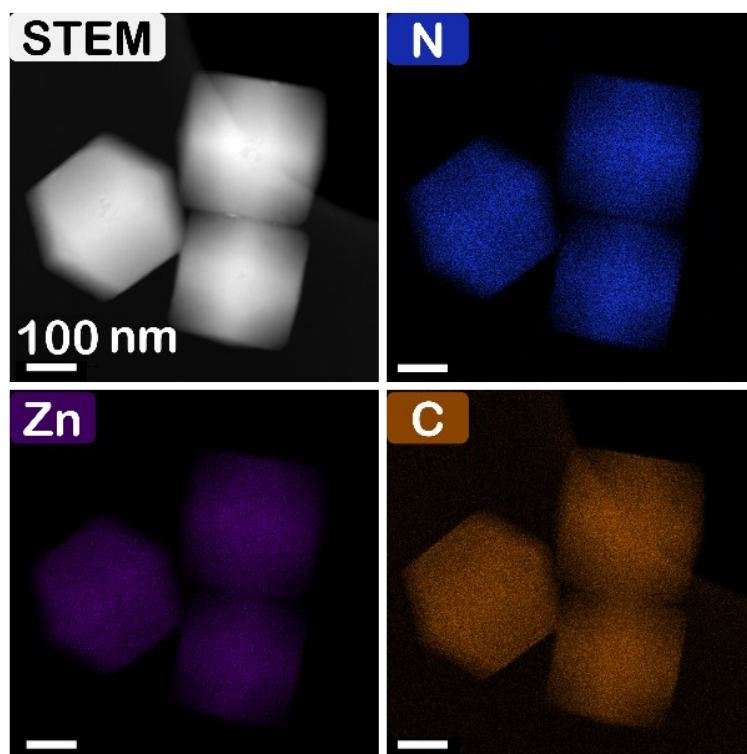

**Figure S7.** STEM-EELS of Zn-ZIF8 particles. Elemental maps show a uniform distribution of Zn, N, and C.

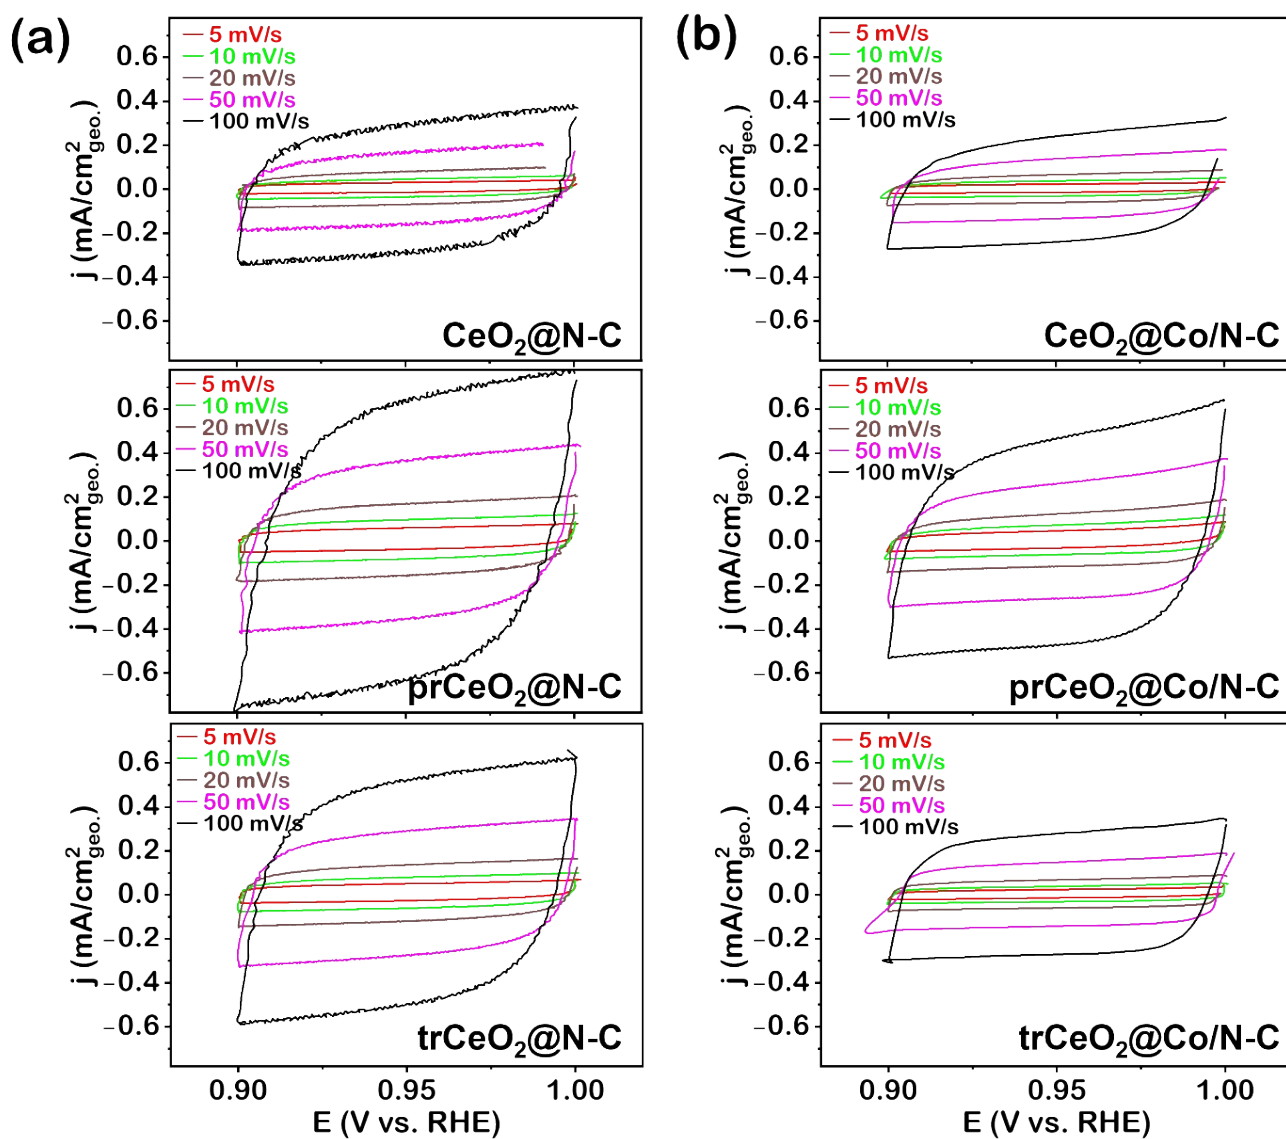

**Figure S8.** CVs in the non-Faradaic region in 0.1 M KOH for ECSA determination. Panel (a) displays the CVs of catalysts derived from Zn-ZIF8 ( $\text{CeO}_2@\text{N-C}$ ,  $\text{prCeO}_2@\text{N-C}$ , and  $\text{trCeO}_2@\text{N-C}$ ). Panel (b) displays the CVs of catalysts derived from Co/Zn-ZIF ( $\text{CeO}_2@\text{Co/N-C}$ ,  $\text{prCeO}_2@\text{Co/N-C}$ , and  $\text{trCeO}_2@\text{Co/N-C}$ ).

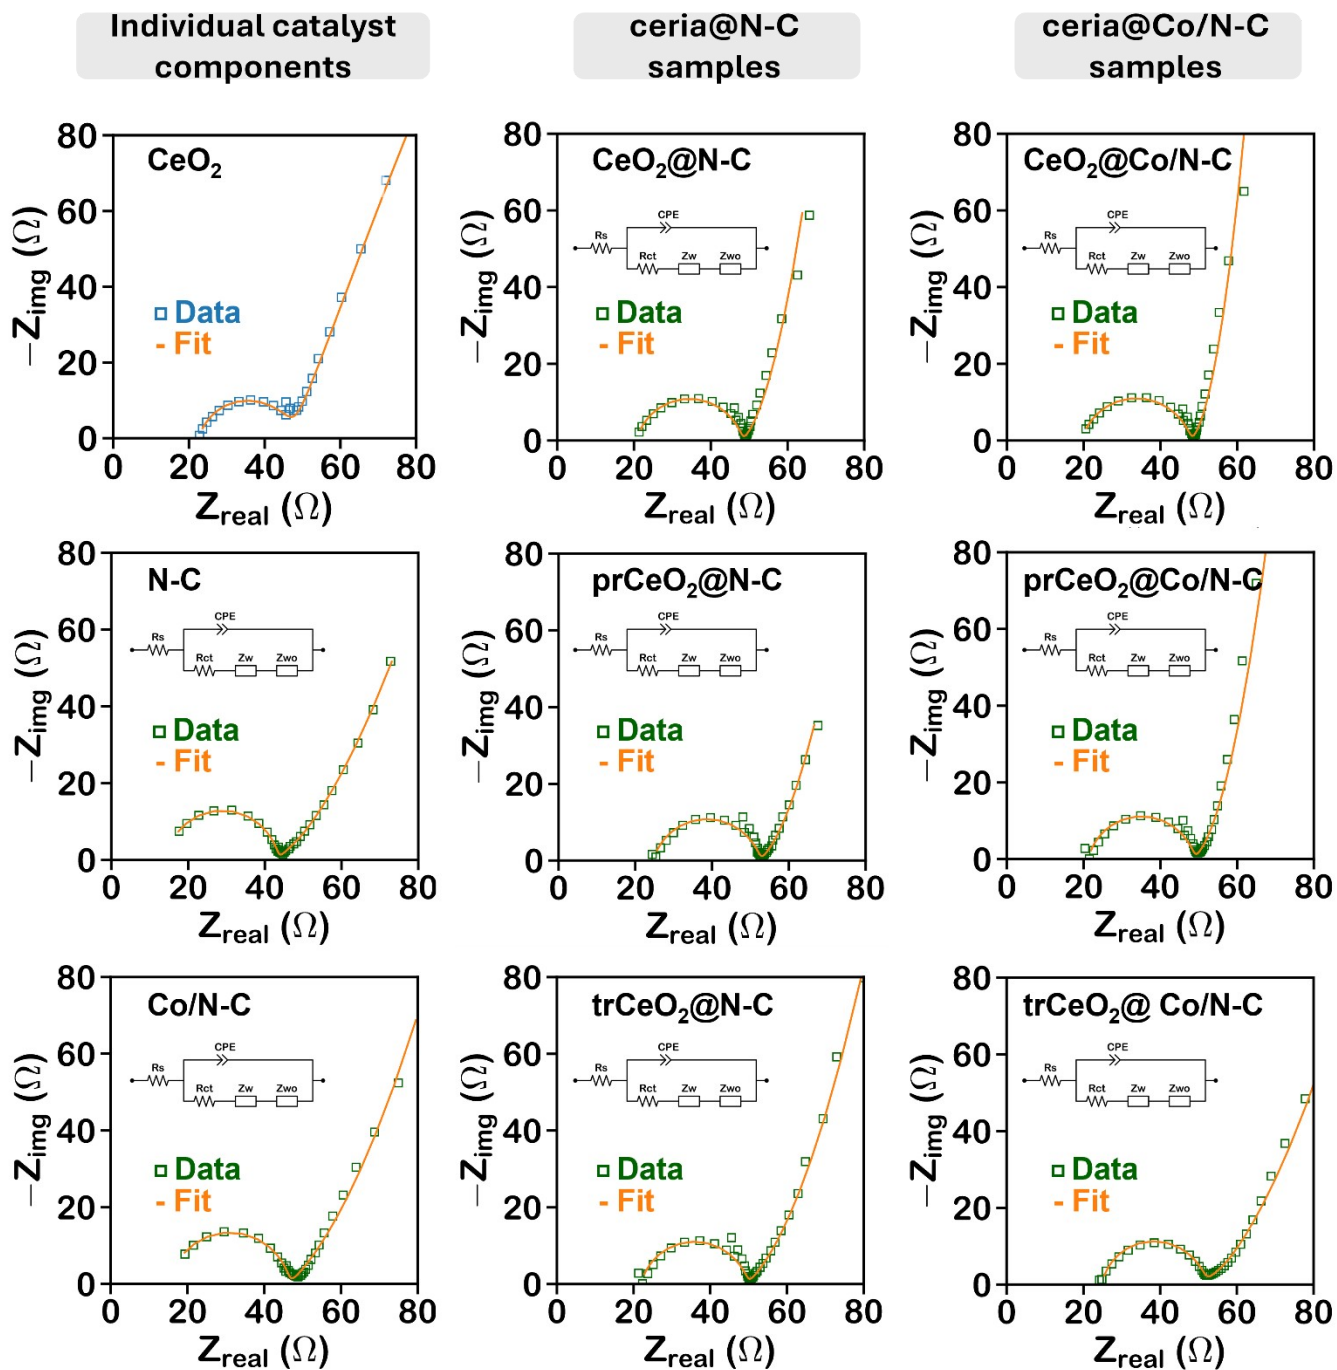

Figure S9. Fitted EIS Nyquist Plots.

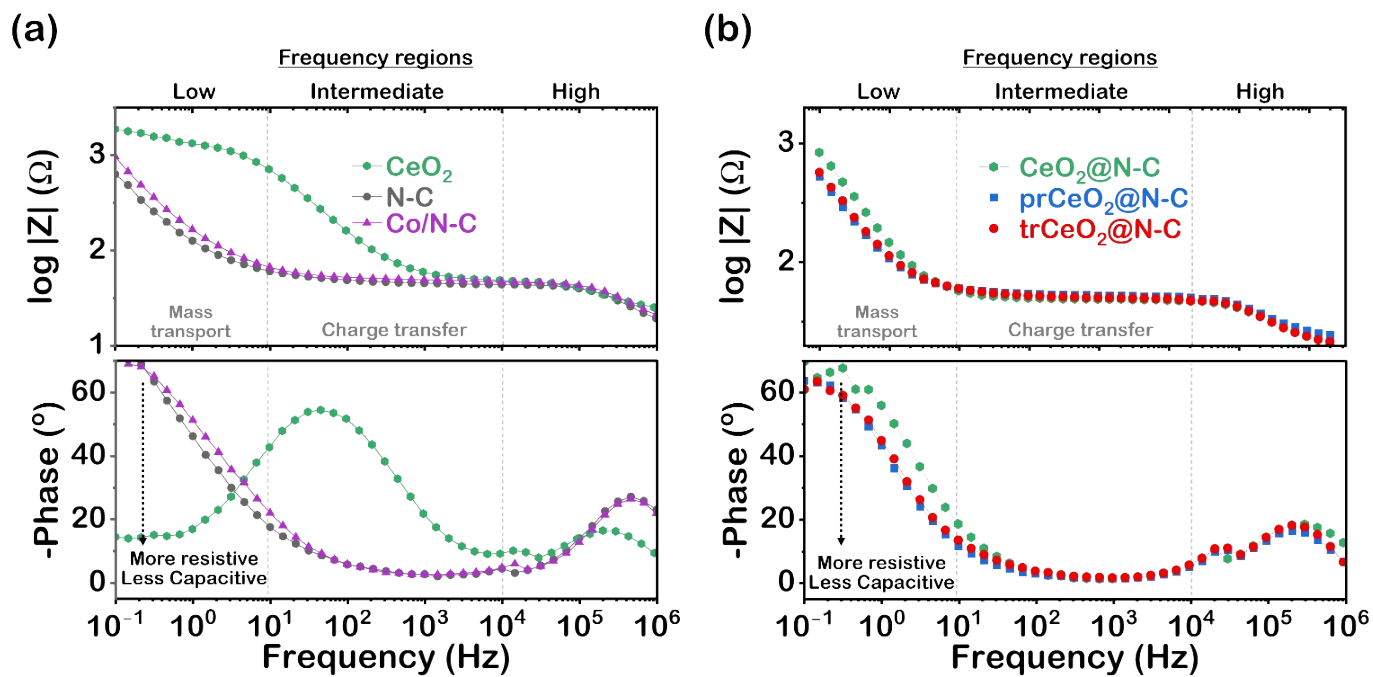

**Figure S10.** EIS Bode magnitude (top) and phase angle (bottom) plots of (a) isolated catalyst components ( $\text{CeO}_2$ , N-C, and Co/N-C). (b) ceria@N-C electrocatalysts ( $\text{CeO}_2@N-C$ ,  $\text{prCeO}_2@N-C$ , and  $\text{trCeO}_2@N-C$ ).

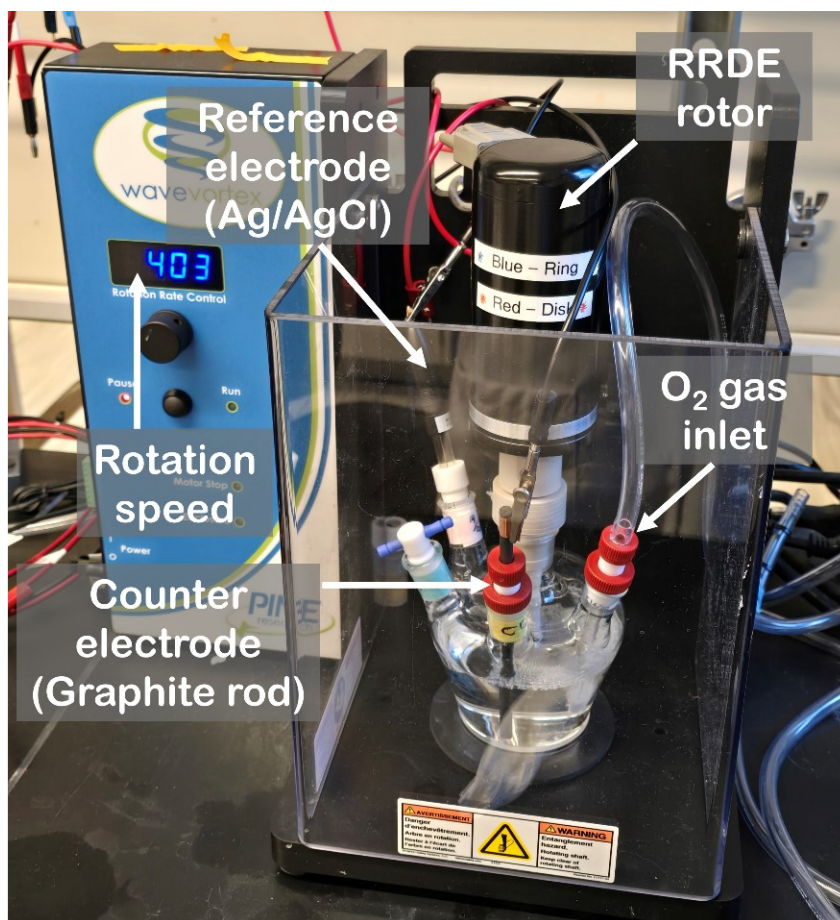

**Figure S11.** Rotating ring-disk electrode (RRDE) setup for performance evaluation of ORR catalysts. The catalyst is deposited on a glassy carbon disk electrode ( $0.2 \text{ mg/cm}^2$ ), and  $\text{H}_2\text{O}_2$  generated is detected at a Pt ring.

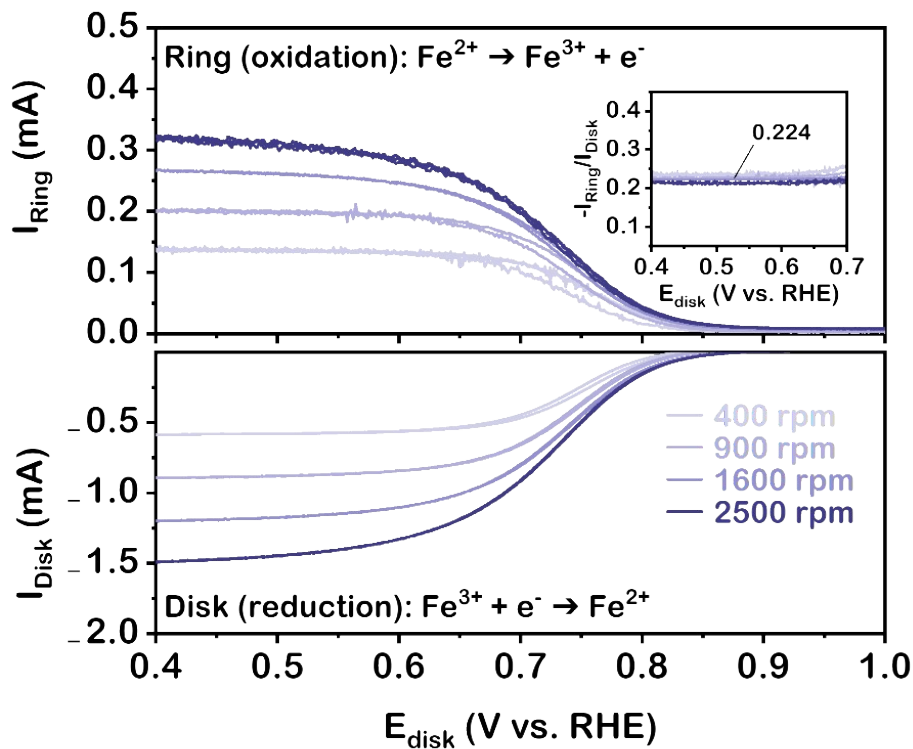

**Figure S12.** Ring collection efficiency ( $N$ ) determined from the redox of potassium ferricyanide ( $\text{K}_3[\text{Fe}(\text{CN})_6]$ ). Voltammograms were collected at 400, 900, 1600, and 2500 rpm in Ar-saturated 1 M KCl with 10 mM  $\text{K}_3[\text{Fe}(\text{CN})_6]$ . The inset shows the corresponding collection efficiency between 0.4 and 0.7 V vs. RHE.

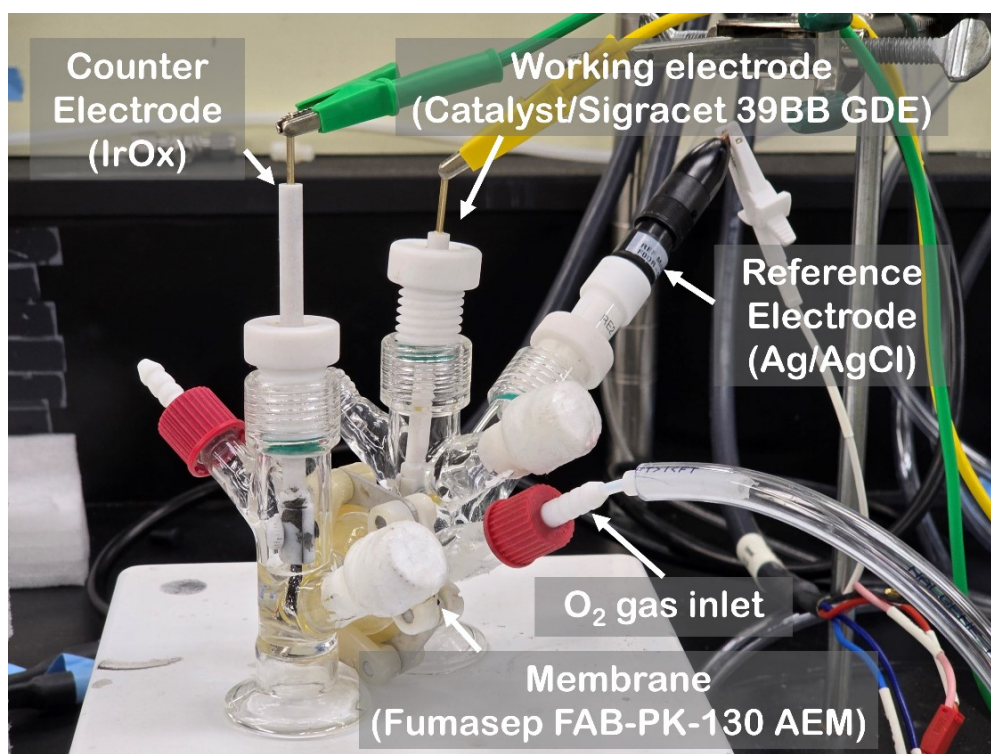

**Figure S13.** Two-compartment H-Cell setup used for  $\text{H}_2\text{O}_2$  quantification. Chronoamperometry tests were run in 0.1 M KOH using a working electrode geometric area of  $0.5 \text{ cm}^2$ . The total electrolyte volume used is 22 mL, where 1 mL sample from the catholyte is withdrawn for  $\text{H}_2\text{O}_2$  quantification.

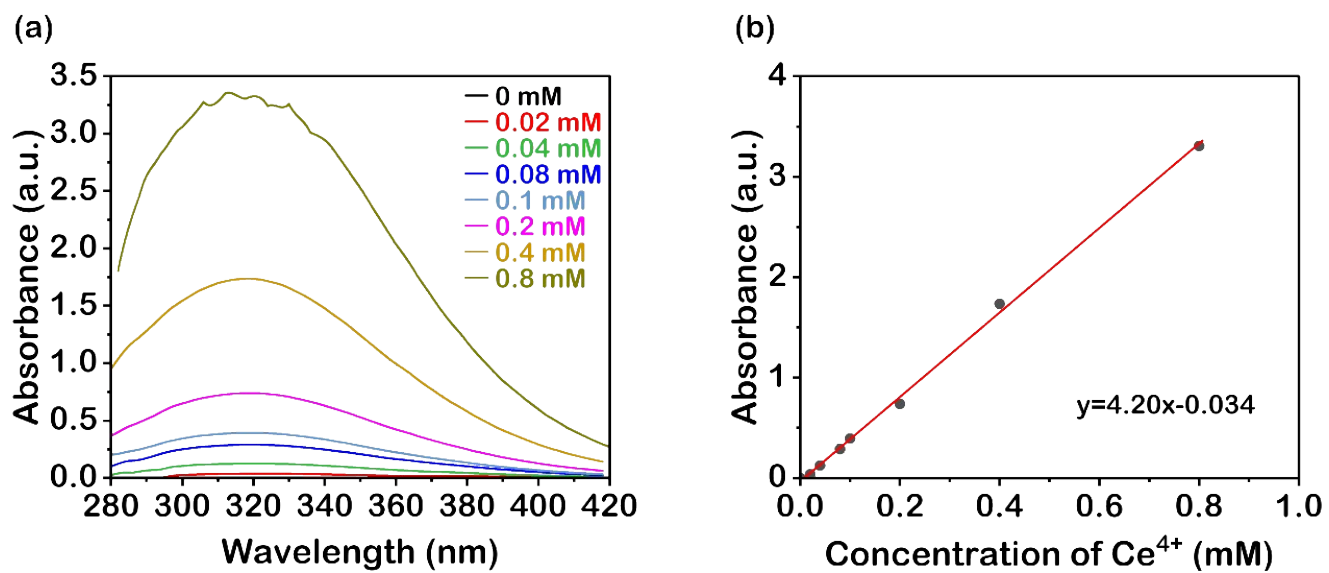

**Figure S14.** (a) UV-Vis spectra for 0-0.8 mM CeSO<sub>4</sub> in 0.5 M H<sub>2</sub>SO<sub>4</sub>. (b) The corresponding calibration curve used for H<sub>2</sub>O<sub>2</sub> quantification from H-Cell tests.

**Table S1.** FWHM values extracted from XRD diffraction peaks of CeO<sub>2</sub>, prCeO<sub>2</sub>, and trCeO<sub>2</sub>.

| Precursor          | Reflection (hkl) | 2 $\theta$ (°) | FWHM   |
|--------------------|------------------|----------------|--------|
| CeO <sub>2</sub>   | 111              | 28.57          | 0.5923 |
|                    | 200              | 33.07          | 0.5599 |
|                    | 220              | 47.54          | 0.7562 |
| prCeO <sub>2</sub> | 111              | 28.65          | 0.4447 |
|                    | 200              | 33.16          | 0.4517 |
|                    | 220              | 47.56          | 0.4621 |
| trCeO <sub>2</sub> | 111              | 28.50          | 0.4980 |
|                    | 200              | 33.01          | 0.4769 |
|                    | 220              | 47.45          | 0.5004 |

**Table S2.** Average crystallite size (D) values estimated from the (111) reflection in XRD patterns of CeO<sub>2</sub>, prCeO<sub>2</sub>, and trCeO<sub>2</sub>.

| Precursor          | D/Scherrer Width (nm) |
|--------------------|-----------------------|
| CeO <sub>2</sub>   | 18.14                 |
| prCeO <sub>2</sub> | 21.66                 |
| trCeO <sub>2</sub> | 20.94                 |

**Table S3.** Interplanar distance (d-spacing) values estimated from XRD patterns of CeO<sub>2</sub>, prCeO<sub>2</sub>, and trCeO<sub>2</sub>.

| Precursor          | Reflection (hkl) | 2 $\theta$ (°) | d-spacing (Å) (Cu K $\alpha$ ) |
|--------------------|------------------|----------------|--------------------------------|
| CeO <sub>2</sub>   | 111              | 28.57          | 3.12                           |
|                    | 200              | 33.07          | 2.71                           |
|                    | 220              | 47.54          | 1.91                           |
| prCeO <sub>2</sub> | 111              | 28.65          | 3.11                           |
|                    | 200              | 33.16          | 2.70                           |
|                    | 220              | 47.56          | 1.91                           |
| trCeO <sub>2</sub> | 111              | 28.50          | 3.13                           |
|                    | 200              | 33.01          | 2.71                           |
|                    | 220              | 47.45          | 1.92                           |

**Table S4.** EPR cavity Q-factor and peak-to-peak widths for CeO<sub>2</sub>, prCeO<sub>2</sub>, and trCeO<sub>2</sub>.

| Sample             | Q-factor | Peak-to-Peak width (G) |
|--------------------|----------|------------------------|
| CeO <sub>2</sub>   | 4316     | 10.5                   |
| prCeO <sub>2</sub> | 3993     | 9.5                    |
| trCeO <sub>2</sub> | 3614     | 8.6                    |

**Table S5.** Values of  $C_{dl}$  and electrochemically active surface area (ECSA) obtained from the  $C_{dl}$  method.

| Catalyst                   | $C_{dl}$ (mF/cm <sup>2</sup> ) | ECSA (m <sup>2</sup> /g) |
|----------------------------|--------------------------------|--------------------------|
| CeO <sub>2</sub>           | 0.13                           | 3.25                     |
| N-C                        | 8.5                            | 212.5                    |
| CeO <sub>2</sub> @N-C      | 5.5                            | 137.5                    |
| prCeO <sub>2</sub> @N-C    | 12.4                           | 310                      |
| trCeO <sub>2</sub> @N-C    | 9.9                            | 247.5                    |
| Co/N-C                     | 8.8                            | 220                      |
| CeO <sub>2</sub> @Co/N-C   | 4.6                            | 115                      |
| prCeO <sub>2</sub> @Co/N-C | 9.1                            | 227.5                    |
| trCeO <sub>2</sub> @Co/N-C | 5.4                            | 135                      |

**Table S6.** Fitting parameters for EIS Nyquist plots.

| Catalyst                   | $R_s$<br>( $\Omega$ ) | $R_{ct}$<br>( $\Omega$ ) | CPE<br>( $\Omega^{-1} \cdot s^\alpha$ ) | $\alpha$ | W<br>( $\Omega \cdot s^{-1/2}$ ) | $W_o$<br>( $\Omega$ ) |
|----------------------------|-----------------------|--------------------------|-----------------------------------------|----------|----------------------------------|-----------------------|
| N-C                        | 14.4                  | 29.0                     | 6.12e-08                                | 0.92     | 105.9                            | 2.942                 |
| CeO <sub>2</sub> @N-C      | 20.7                  | 27.5                     | 2.70e-07                                | 0.85     | 57.34                            | 0.072                 |
| prCeO <sub>2</sub> @N-C    | 24.7                  | 27.8                     | 3.88e-07                                | 0.84     | 51.68                            | 0.050                 |
| trCeO <sub>2</sub> @N-C    | 21.9                  | 27.7                     | 1.97e-07                                | 0.89     | 74.02                            | 0.045                 |
| Co/N-C                     | 15.6                  | 30.9                     | 6.93e-08                                | 0.91     | 121.3                            | 0.465                 |
| CeO <sub>2</sub> @Co/N-C   | 19.5                  | 28.4                     | 3.05e-07                                | 0.84     | 55.07                            | 0.145                 |
| prCeO <sub>2</sub> @Co/N-C | 21.3                  | 27.5                     | 3.69e-07                                | 0.85     | 55.14                            | 0.859                 |
| trCeO <sub>2</sub> @Co/N-C | 24.9                  | 26.7                     | 1.97e-07                                | 0.89     | 137.4                            | 2.945                 |

| Catalyst         | $R_s$<br>( $\Omega$ ) | $R_1$<br>( $\Omega$ ) | $CPE_1$<br>( $\Omega^{-1} \cdot s^{\alpha_1}$ ) | $\alpha_1$ | $R_2$<br>( $\Omega$ ) | $CPE_2$<br>( $\Omega^{-1} \cdot s^{\alpha_2}$ ) | $\alpha_2$ | W<br>( $\Omega \cdot s^{-1/2}$ ) |
|------------------|-----------------------|-----------------------|-------------------------------------------------|------------|-----------------------|-------------------------------------------------|------------|----------------------------------|
| CeO <sub>2</sub> | 22.6                  | 24.0                  | 3.67e-07                                        | 0.85       | 24.0                  | 4.33e-05                                        | 0.82       | 235                              |

\*  $R_{ct} = R_1 + R_2$

**Table S7.** ECSA-normalized activity.

| Catalyst                   | $j$ (mA/cm <sup>2</sup> ) @0.75 V | $j_d$ (mA/cm <sup>2</sup> ) | $j_k$ (mA/cm <sup>2</sup> ) | $j_{\text{ECSA}}$ ( $\mu\text{A}/\text{cm}^2$ ) |
|----------------------------|-----------------------------------|-----------------------------|-----------------------------|-------------------------------------------------|
| N-C                        | 0.29                              | 3.58                        | 0.316                       | 0.146                                           |
| CeO <sub>2</sub> @N-C      | 0.07                              | 4.06                        | 0.066                       | 0.044                                           |
| prCeO <sub>2</sub> @N-C    | 0.17                              | 4.08                        | 0.174                       | 0.055                                           |
| trCeO <sub>2</sub> @N-C    | 0.15                              | 3.79                        | 0.159                       | 0.063                                           |
| Co/N-C                     | 3.17                              | 5.15                        | 8.245                       | 3.673                                           |
| CeO <sub>2</sub> @Co/N-C   | 0.87                              | 4.79                        | 1.063                       | 0.903                                           |
| prCeO <sub>2</sub> @Co/N-C | 1.51                              | 4.74                        | 2.216                       | 0.956                                           |
| trCeO <sub>2</sub> @Co/N-C | 1.24                              | 4.68                        | 1.687                       | 1.237                                           |

**Table S8.** H<sub>2</sub>O<sub>2</sub> yield rate after 30-minute chronoamperometry at 0.1 V vs. RHE.

| Catalyst                | [H <sub>2</sub> O <sub>2</sub> ] | Yield rate (mmol g <sub>cat</sub> <sup>-1</sup> h <sup>-1</sup> ) |
|-------------------------|----------------------------------|-------------------------------------------------------------------|
| Carbon paper (CP)       | 3.57                             | 0.31                                                              |
| N-C                     | 4.92                             | 0.44                                                              |
| prCeO <sub>2</sub> @N-C | 3.18                             | 0.28                                                              |
| trCeO <sub>2</sub> @N-C | 4.67                             | 0.41                                                              |

## References

1. C. C. L. McCrory, S. Jung, J. C. Peters and T. F. Jaramillo, Benchmarking Heterogeneous Electrocatalysts for the Oxygen Evolution Reaction, 2013, <https://doi.org/10.1021/ja407115>.
2. T. A. Centeno and F. Stoeckli, On the specific double-layer capacitance of activated carbons, in relation to their structural and chemical properties, *Journal of Power Sources*, 2006, 154.
3. A. J. Bard and L. R. Faulkner, *Electrochemical methods: fundamentals and applications*, 2001.
